# Supplementary material for: Chromous siloxides of variable nuclearity and magnetism
Source: Royal Society of Chemistry journal article supplement (doi:10.1039/d2dt00354f), 2022-01-01
Supplement: d2dt00354f1.pdf [file d2dt00354f1.pdf]

# Supporting Information

## Chromous siloxides of variable nuclearity and magnetism

Simon P. O. Trzmiel,<sup>a</sup> Jan Langmann,<sup>b</sup> Cécilia Maichle-Mössmer,<sup>a</sup> and Reiner Anwander<sup>a,\*</sup>

a) Institut für Anorganische Chemie, Eberhard Karls Universität Tübingen, Auf der Morgenstelle 18, 72076 Tübingen, Germany

b) Institut für Physik, Universität Augsburg, Universitätsstr. 1, 86159 Augsburg, Germany

\*E-mail for R. A.: [reiner.anwander@uni-tuebingen.de](mailto:reiner.anwander@uni-tuebingen.de)

## Table of Contents

|                              |     |
|------------------------------|-----|
| Magnetic Measurements        | S2  |
| NMR Spectra                  | S4  |
| IR Spectra                   | S7  |
| NMR Spectra                  | S10 |
| Crystallographic Information | S13 |

## Magnetic Measurements

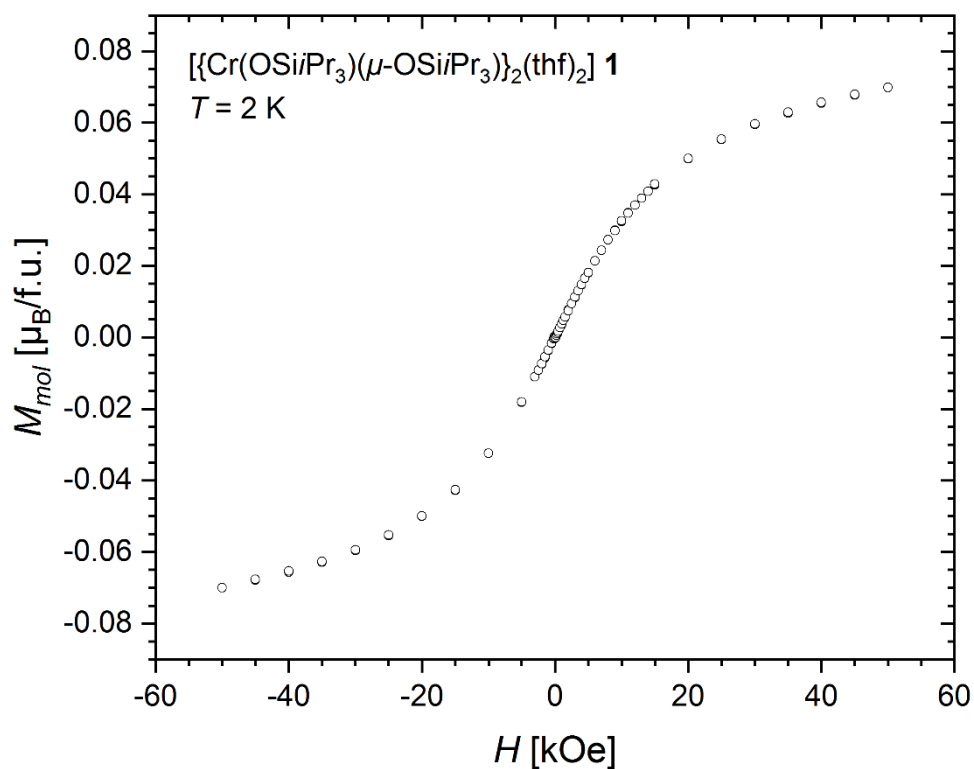

**Figure S1.** Field-dependent molar magnetization  $M_{mol}(H)$  (black open circles) as obtained by SQUID magnetic measurements on crystalline powder of **1** at a temperature  $T = 2$  K.

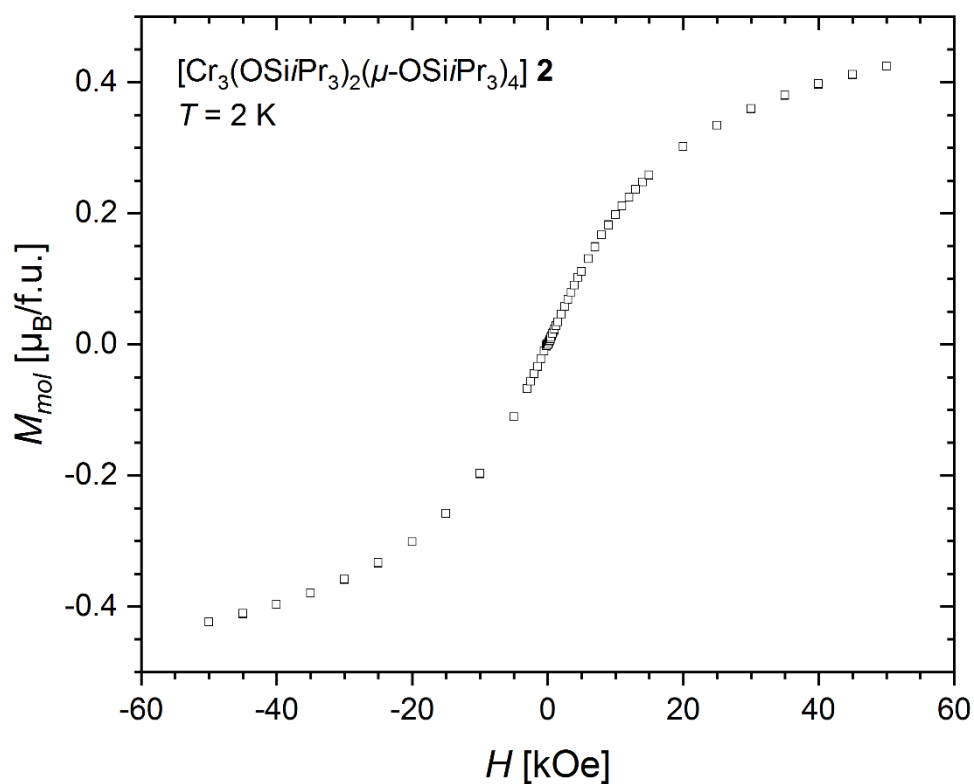

**Figure S2.** Field-dependent molar magnetization  $M_{mol}(H)$  (black open circles) as obtained by SQUID magnetic measurements on crystalline powder of **2** at a temperature  $T = 2$  K.

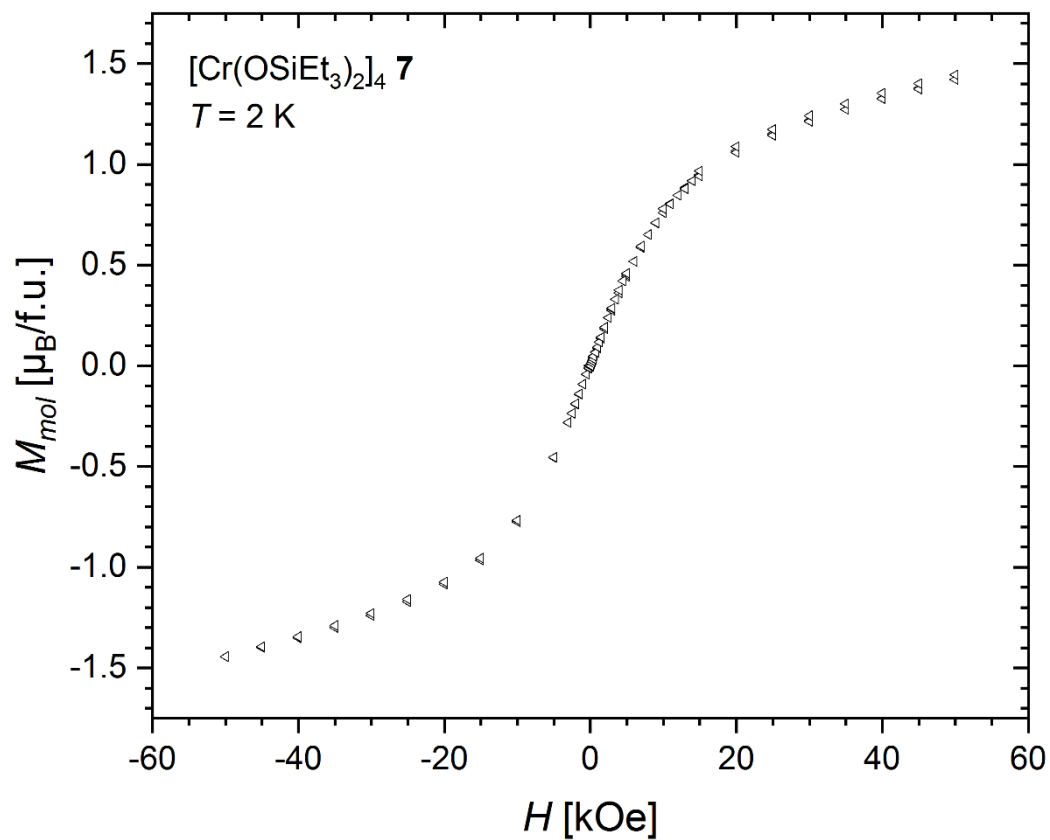

**Figure S3.** Field-dependent molar magnetization  $M_{mol}(H)$  (black open circles) as obtained by SQUID magnetic measurements on crystalline powder of **7** at a temperature  $T = 2$  K.

## NMR Spectra

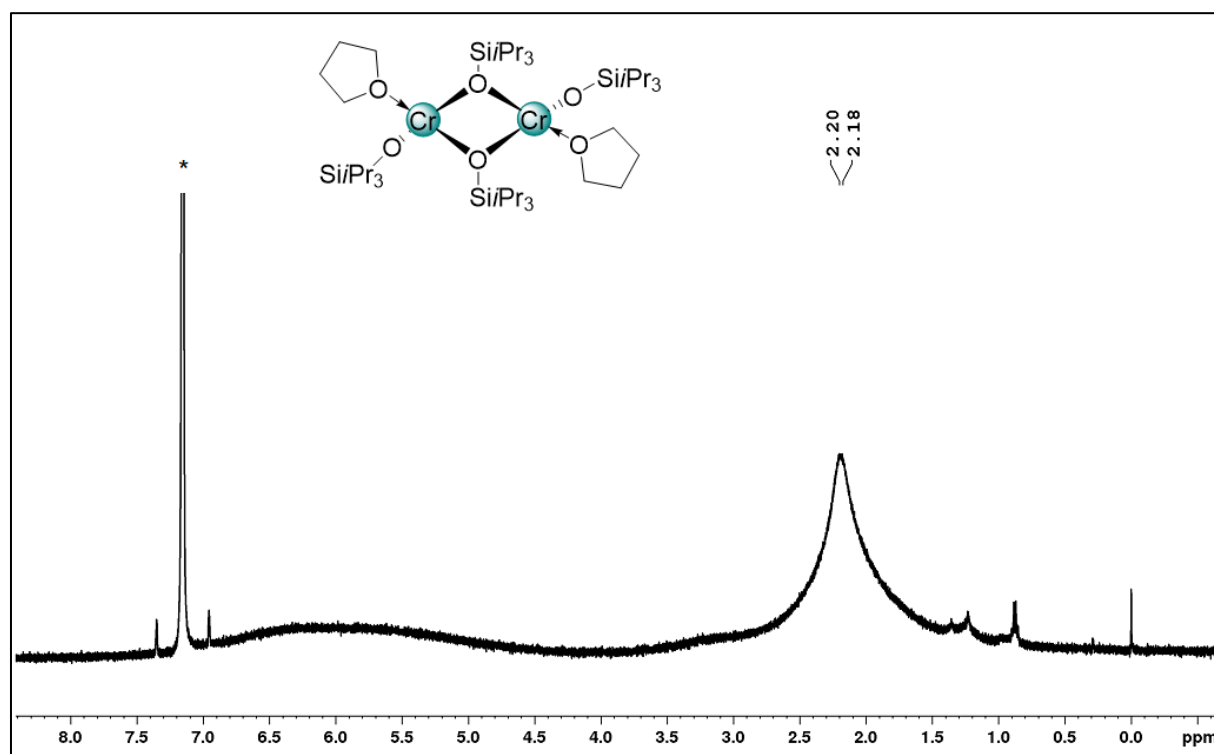

**Figure S4.**  $^1\text{H}$  NMR spectrum (26 °C, 400.13 MHz, benzene- $d_6$ ) of  $\text{Cr}_2(\text{OSiPr}_3)_2(\mu\text{-OSiPr}_3)_2(\text{thf})_2$  (**1**).

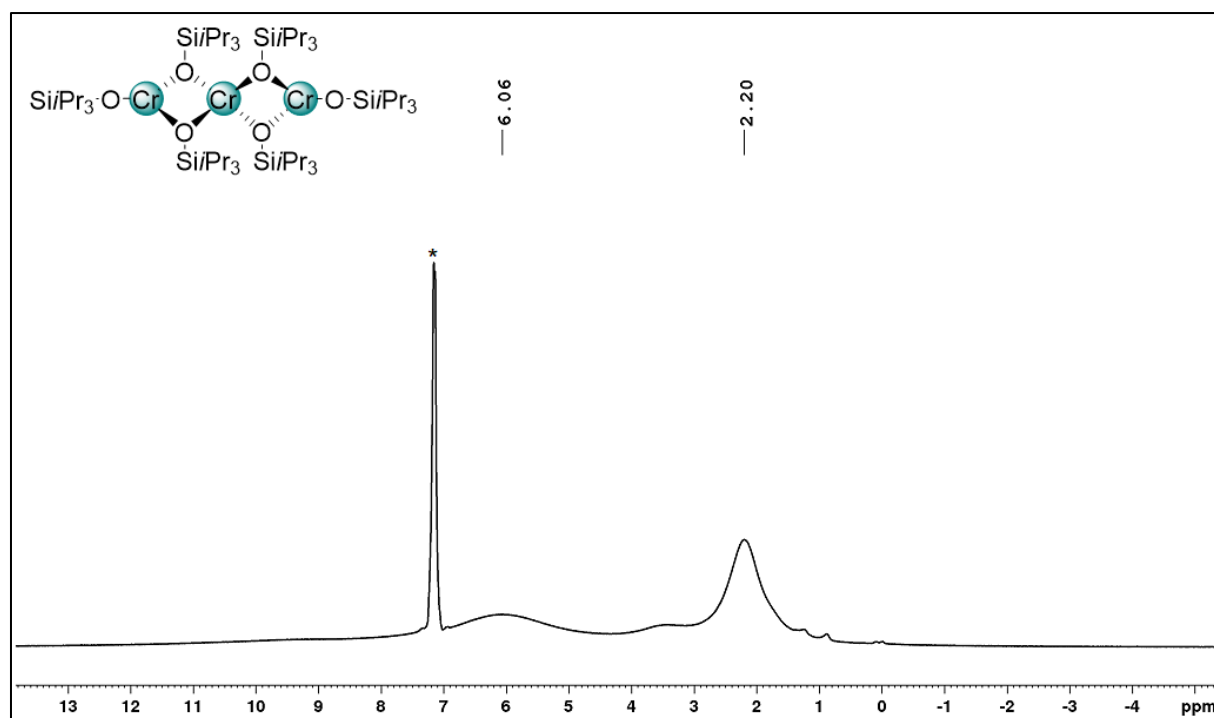

**Figure S5.**  $^1\text{H}$  NMR spectrum (26 °C, 400.13 MHz, benzene- $d_6$ ) of  $\text{Cr}_3(\text{OSiPr}_3)_2(\mu\text{-OSiPr}_3)_4$  (**2**).

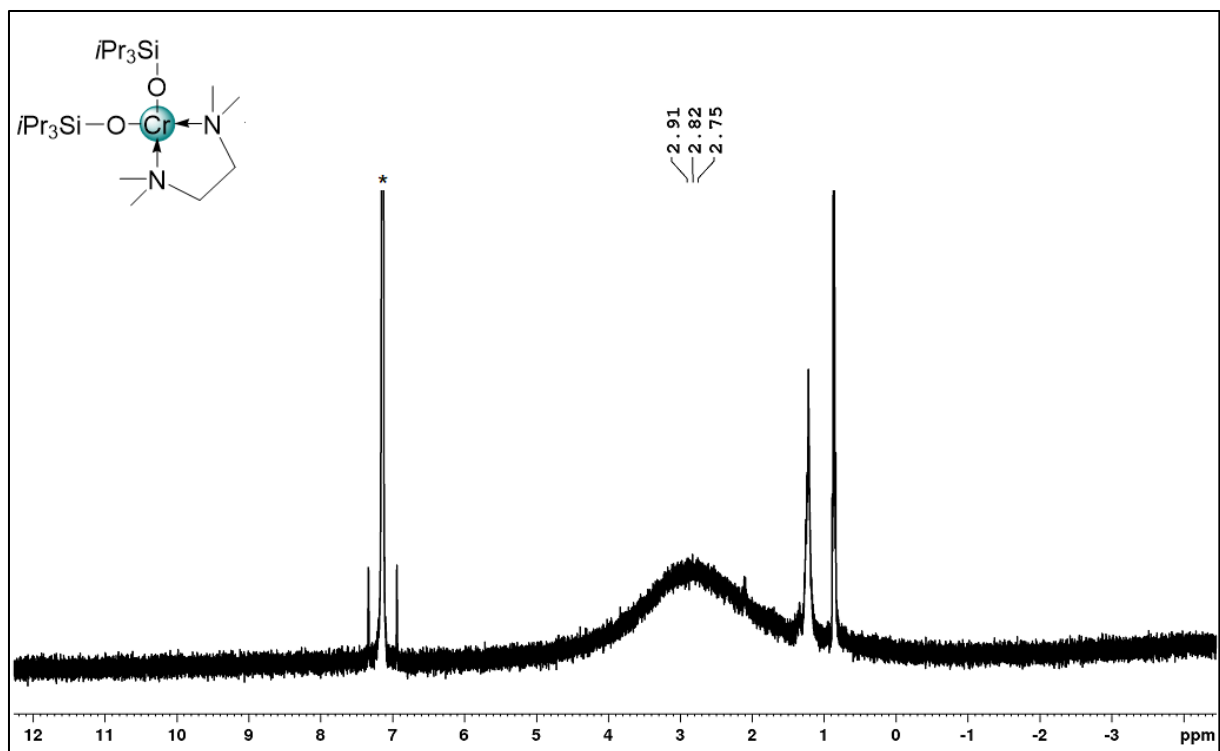

**Figure S6.**  $^1\text{H}$  NMR spectrum (26 °C, 400.13 MHz, benzene- $\text{d}_6$ ) of  $\text{Cr}(\text{OSiPr}_3)_2(\text{tmeda})$  (3).

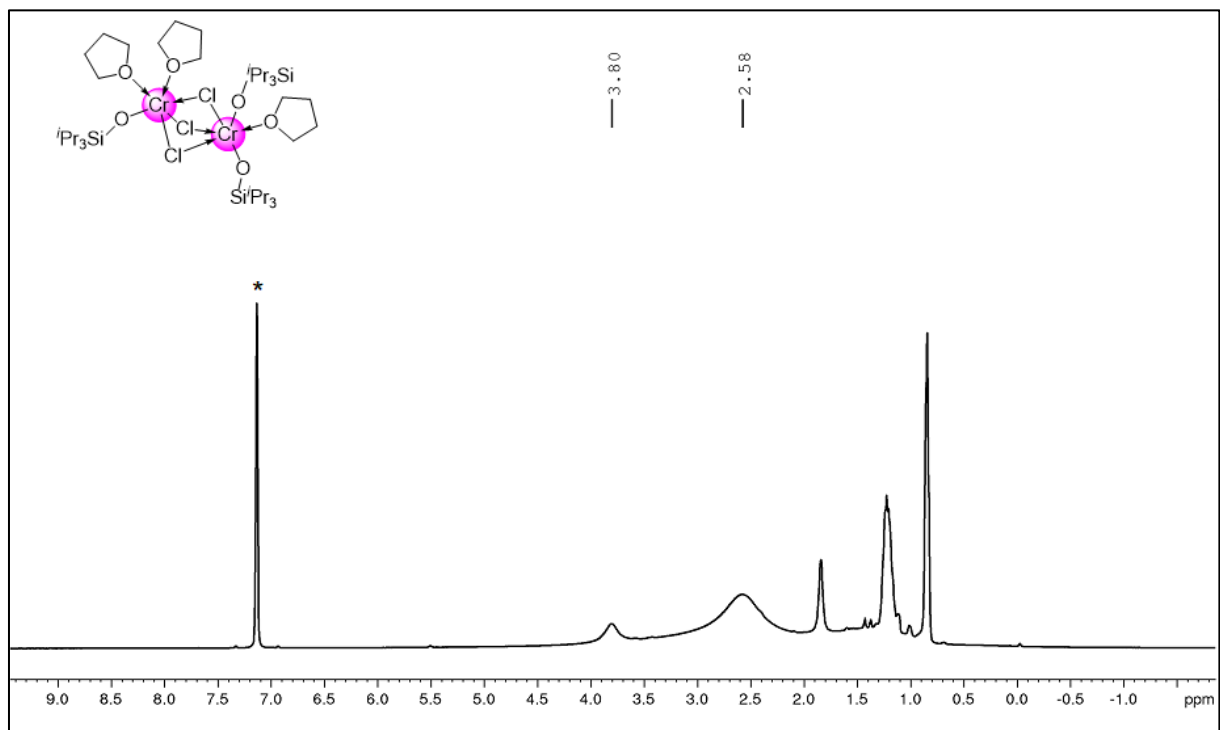

**Figure S7.**  $^1\text{H}$  NMR spectrum (26 °C, 400.13 MHz, benzene- $\text{d}_6$ ) of  $\text{Cr}_2\text{Cl}_3(\text{OSiPr}_3)_3(\text{thf})_3$  (5).

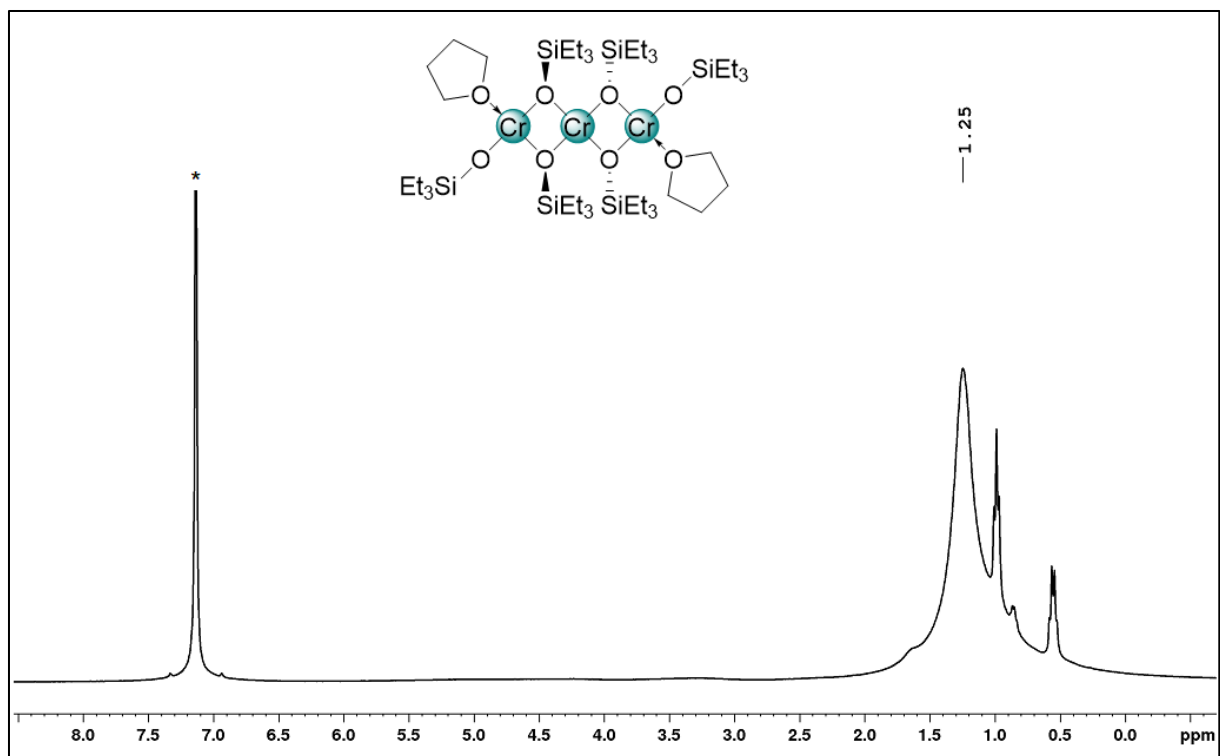

**Figure S8.**  $^1\text{H}$  NMR spectrum (26 °C, 400.13 MHz, benzene- $d_6$ ) of  $\text{Cr}_3(\text{OSiEt}_3)_2(\mu\text{-OSiEt}_3)_4(\text{thf})_2$  (**6**).

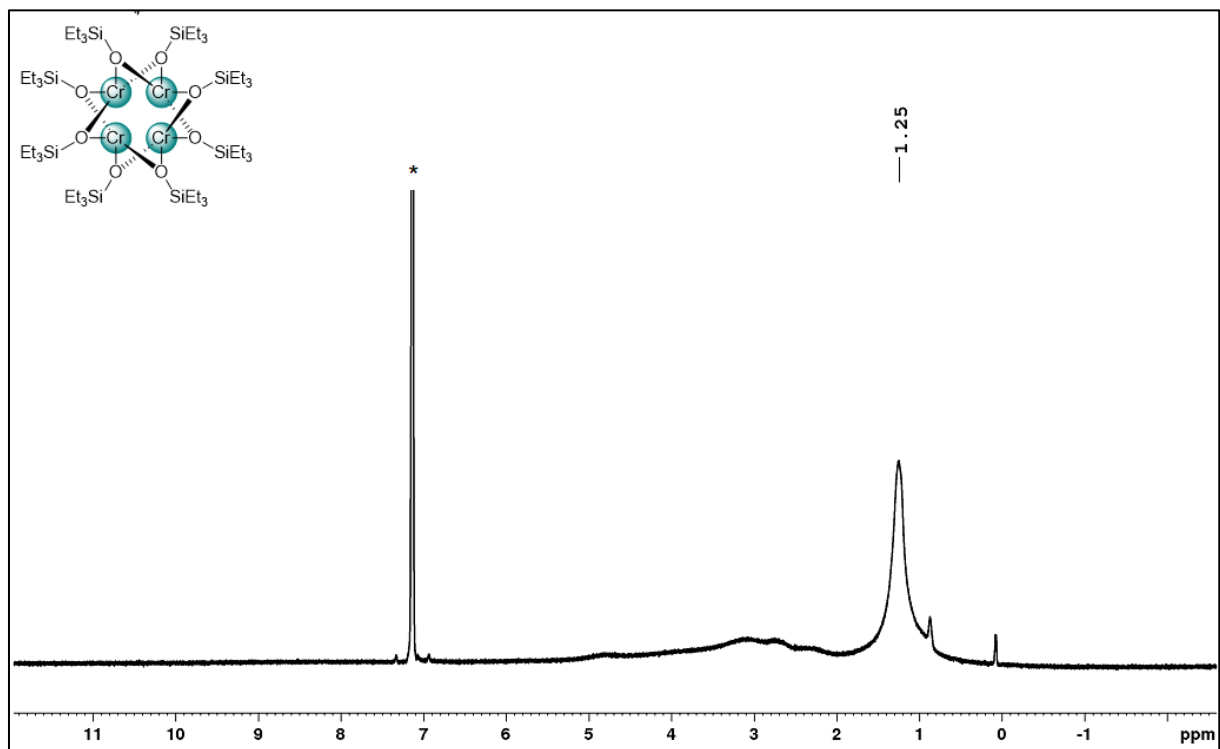

**Figure S9.**  $^1\text{H}$  NMR spectrum (26 °C, 400.13 MHz, benzene- $d_6$ ) of  $\text{Cr}_4(\text{OSiEt}_3)_8$  (**7**).

## IR Spectra

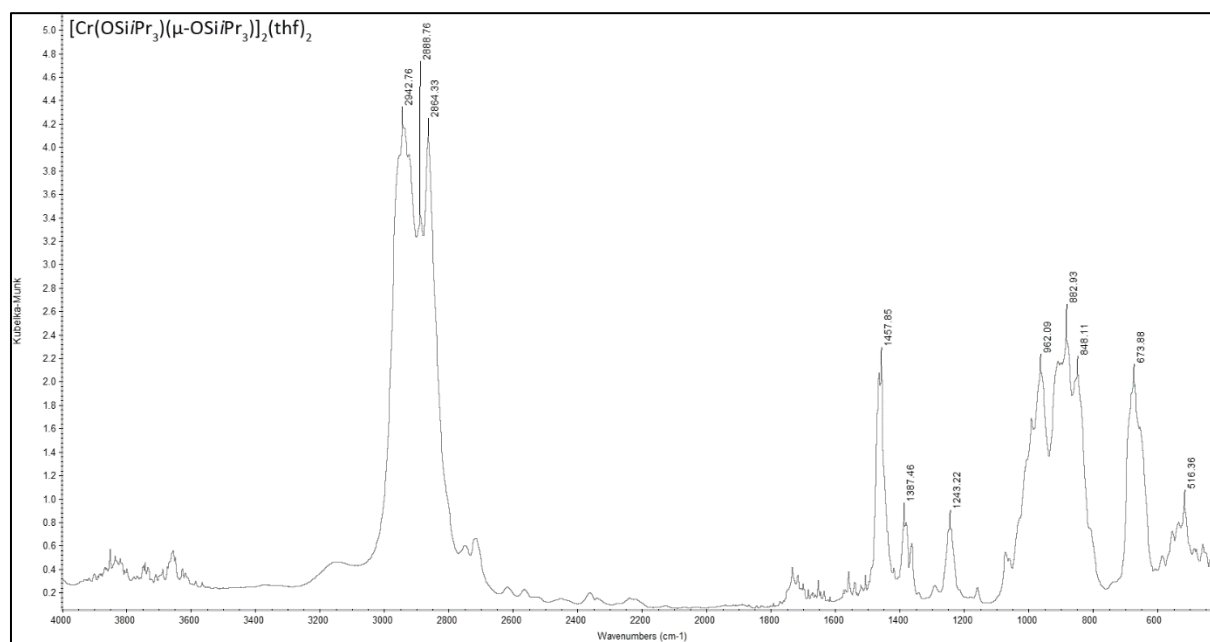

Figure S10. DRIFT spectrum of compound 1 measured on KBr.

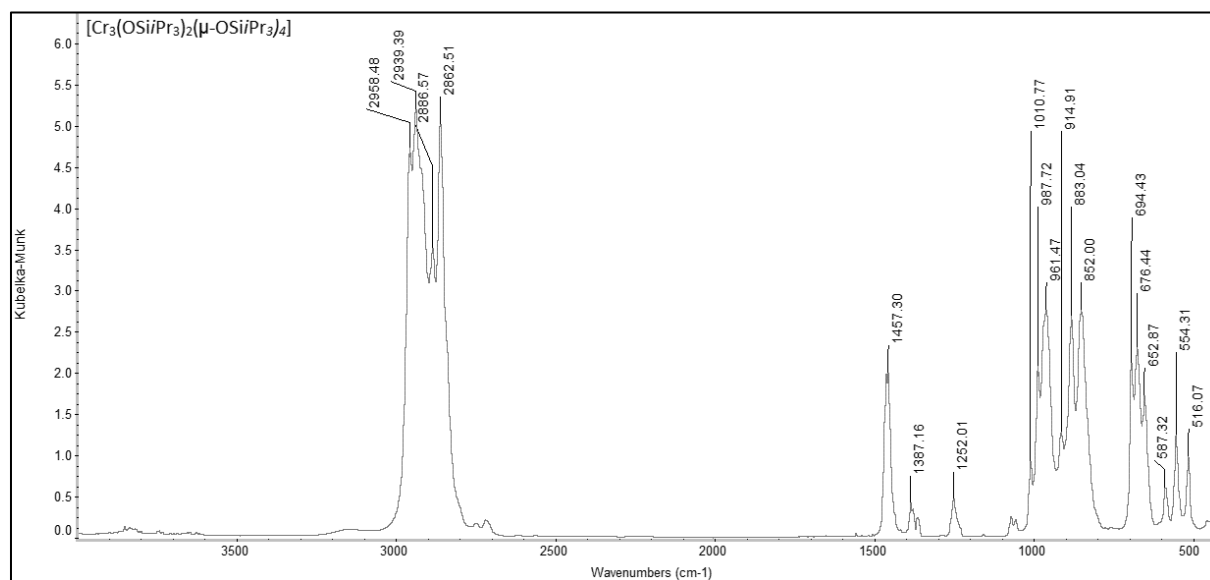

Figure S11. DRIFT spectrum of compound 2 measured on KBr.

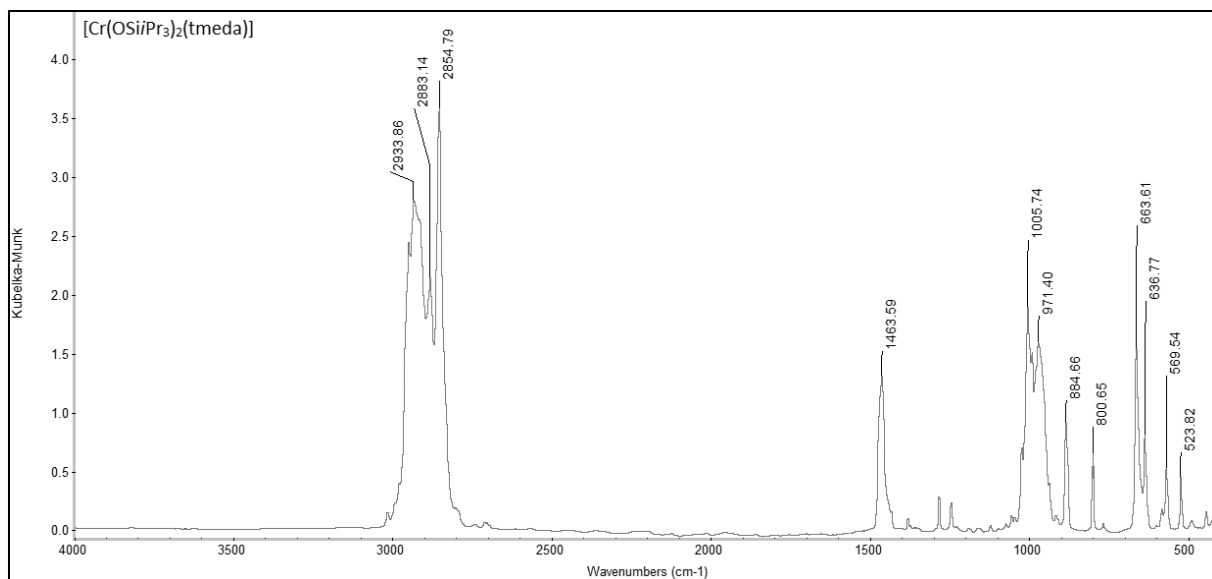

Figure S12. DRIFT spectrum of compound 3 measured on KBr.

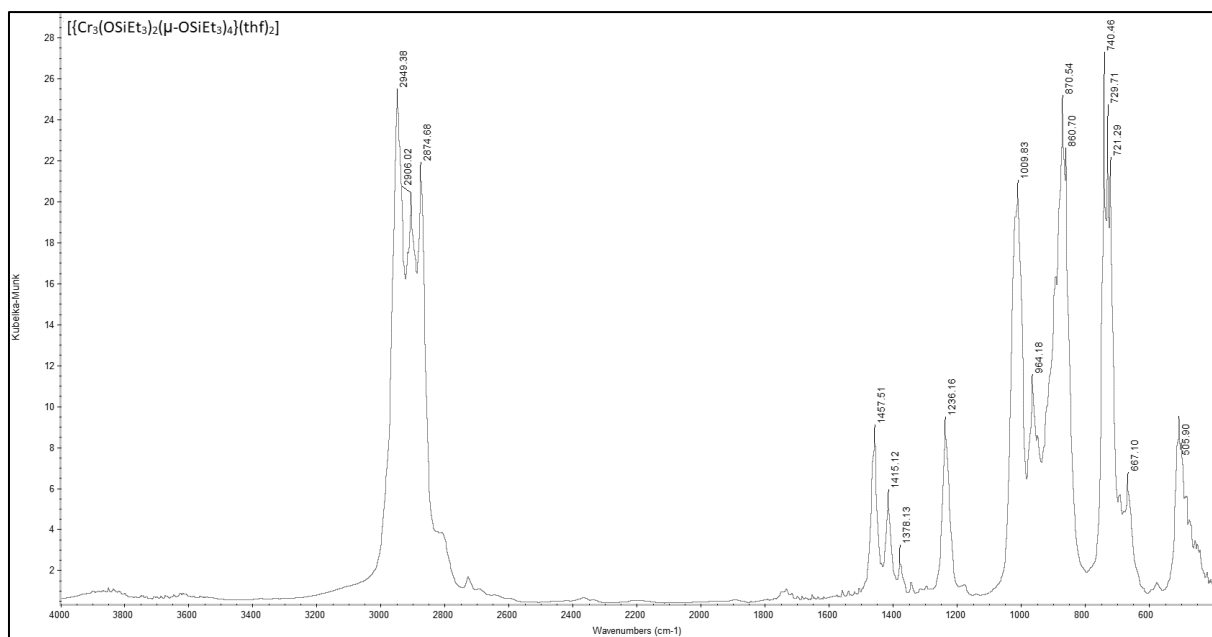

Figure S13. DRIFT spectrum of compound 6 measured on KBr.



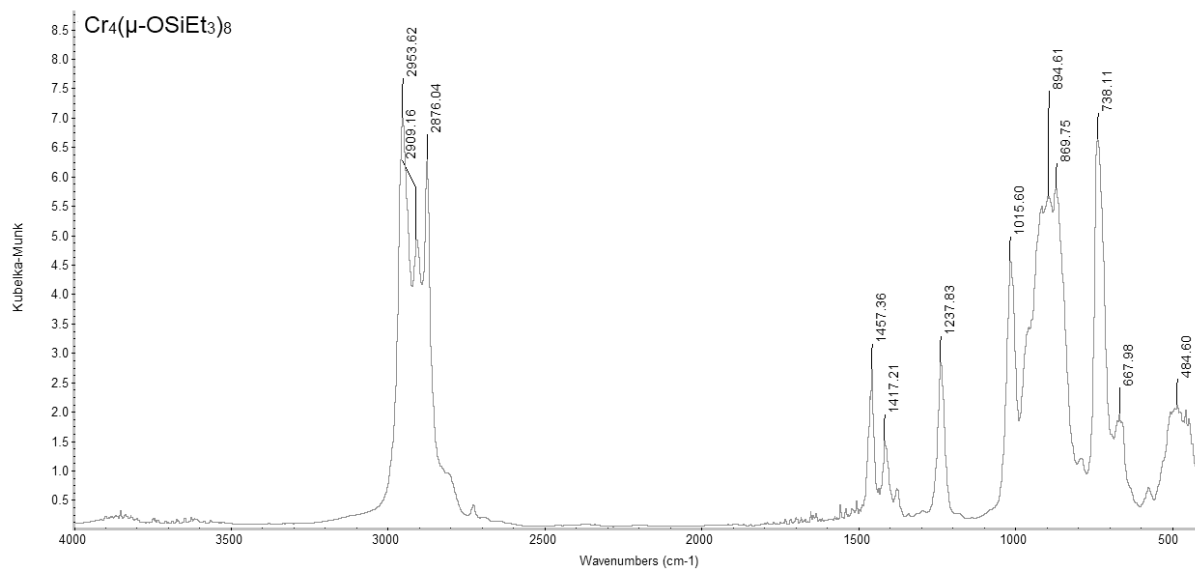

**Figure S14.** DRIFT spectrum of compound **7** measured on KBr.

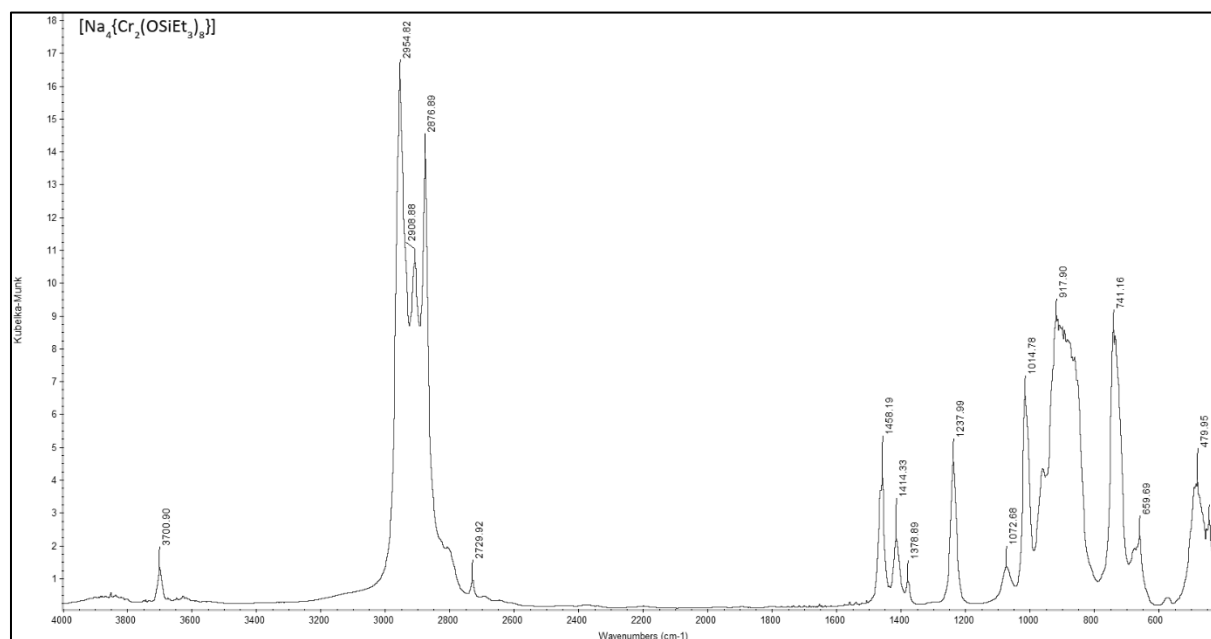

**Figure S15.** DRIFT spectrum of compound **8** measured on KBr.

## UV-vis Spectra

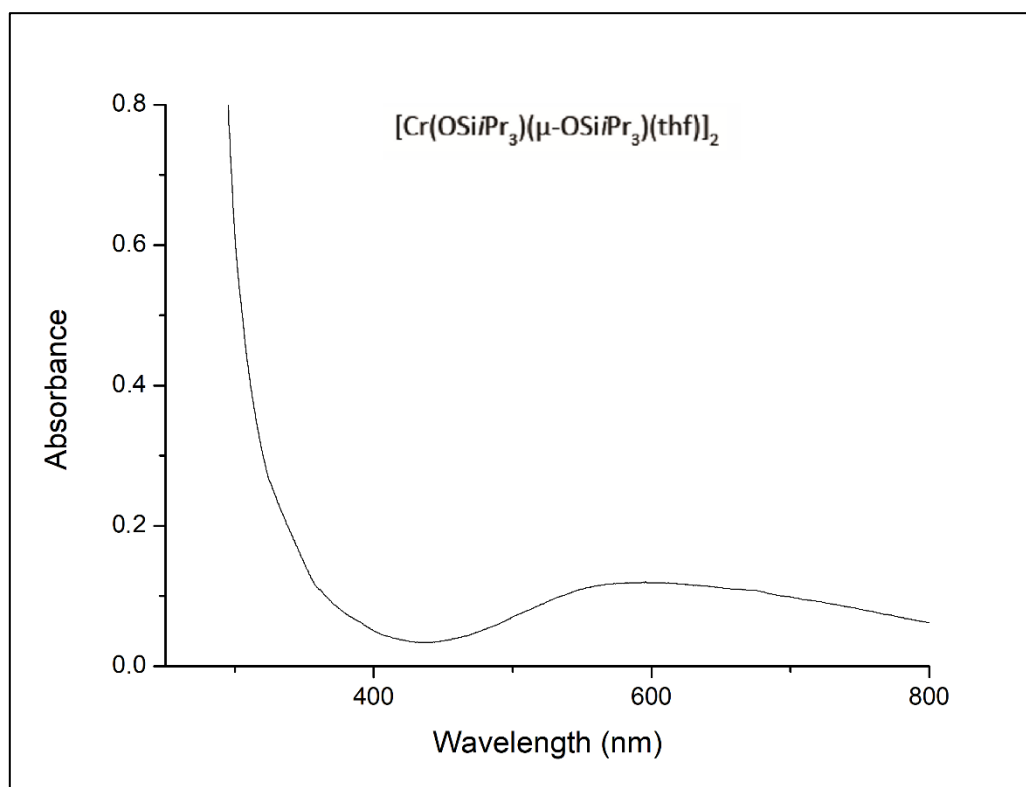

**Figure S16.** UV-vis spectrum of compound **1** in dilute *n*-hexane solution (concentration  $c = 4.9 \cdot 10^{-6}$  [mol $\cdot$ L $^{-1}$ ],  $\epsilon_{590} = 2.4 \cdot 10^4$  L $\cdot$ mol $^{-1}$  $\cdot$ cm $^{-1}$ ).

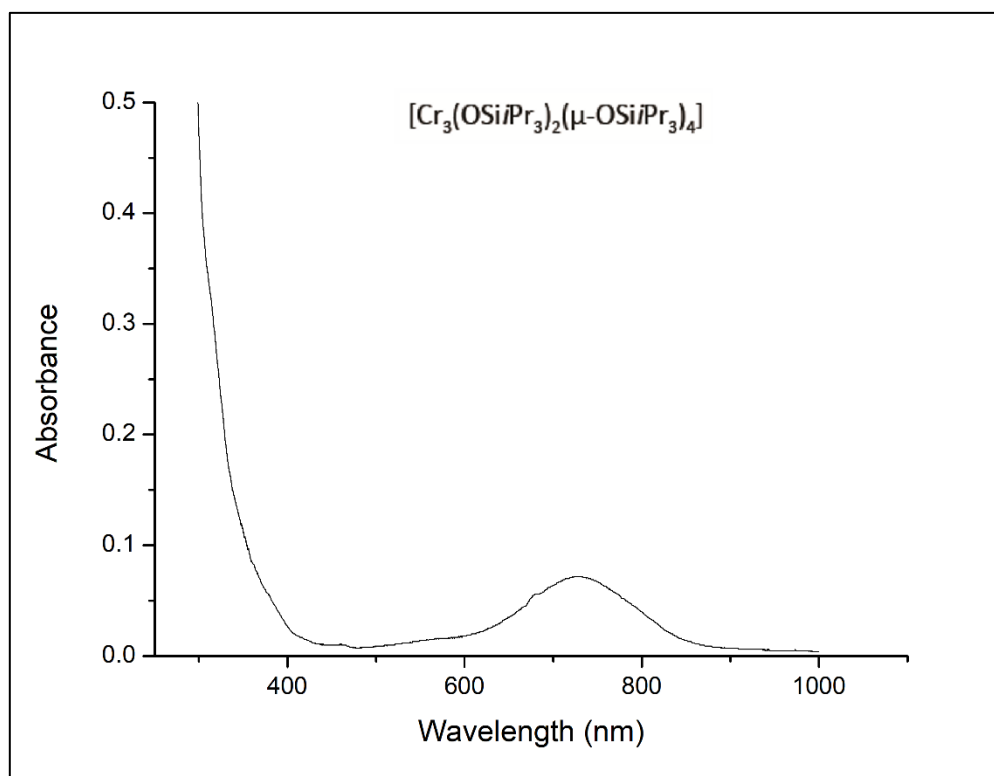

**Figure S17.** UV-vis spectrum of compound **2** in dilute *n*-hexane solution ( $c = 3.9 \cdot 10^{-6}$  [mol $\cdot$ L $^{-1}$ ],  $\epsilon_{727} = 1.8 \cdot 10^4$  L $\cdot$ mol $^{-1}$  $\cdot$ cm $^{-1}$ ).

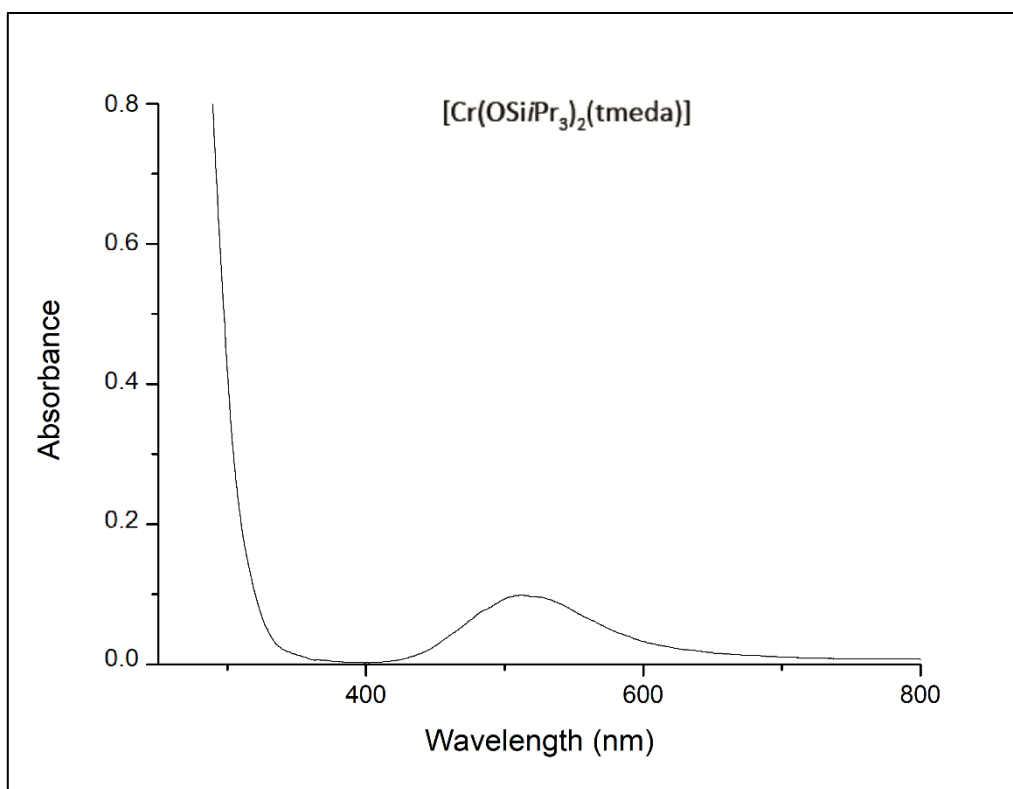

**Figure S18.** UV-vis spectrum of compound **3** in dilute *n*-hexane solution (concentration  $c = 2.2 \cdot 10^{-5}$  [mol $\cdot$ L $^{-1}$ ],  $\epsilon_{508} = 4.3 \cdot 10^4$  L $\cdot$ mol $^{-1}$  $\cdot$ cm $^{-1}$ ).

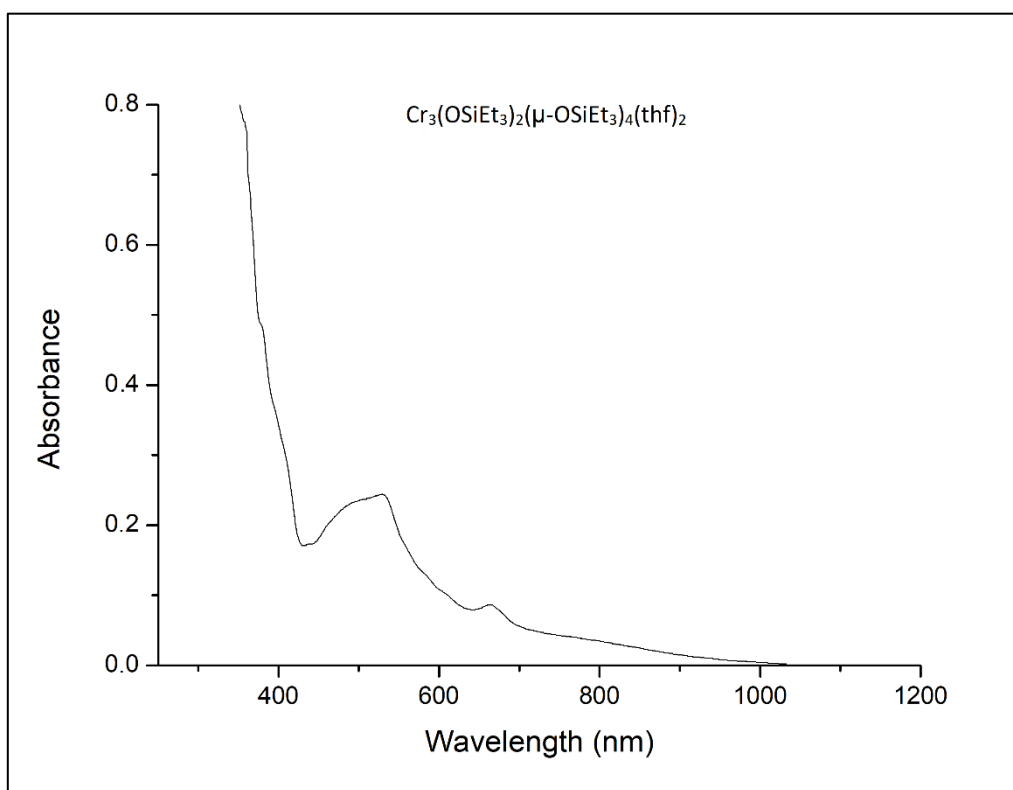

**Figure S19.** UV-vis spectrum of compound **6** in dilute *n*-hexane solution (concentration  $c = 1.1 \cdot 10^{-5}$  [mol $\cdot$ L $^{-1}$ ],  $\epsilon_{528} = 2.2 \cdot 10^4$  L $\cdot$ mol $^{-1}$  $\cdot$ cm $^{-1}$ ).

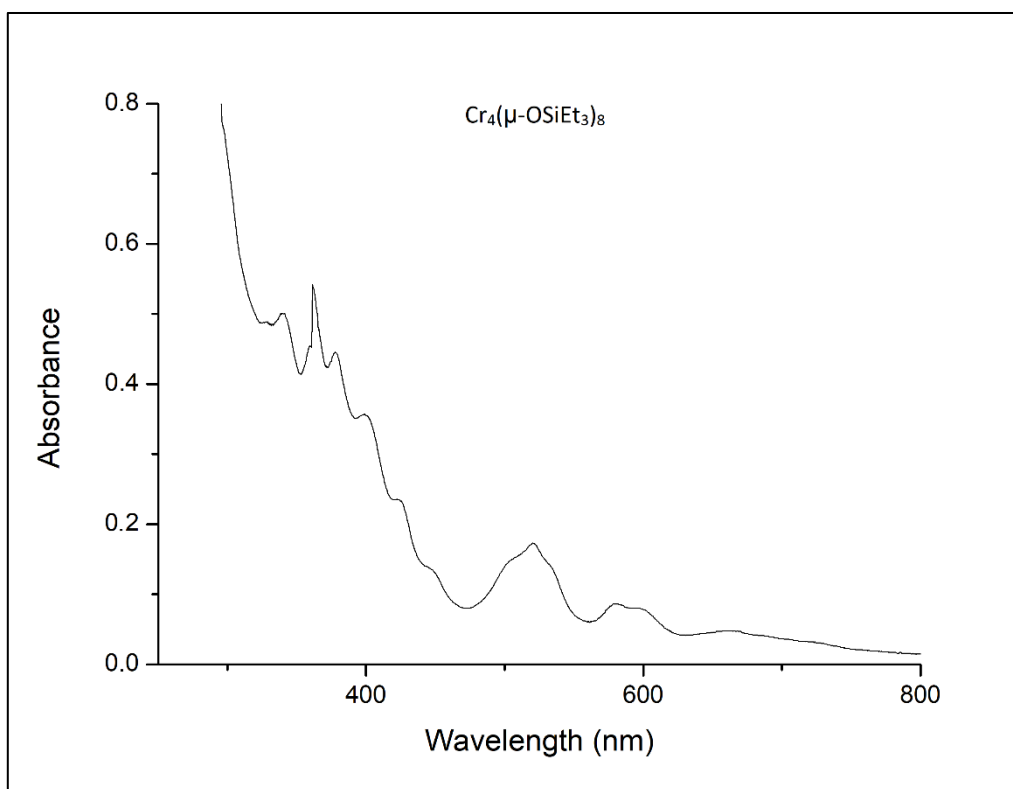

**Figure S20.** UV-vis spectrum of compound **7** in dilute *n*-hexane solution (concentration  $c = 6.2 \cdot 10^{-6} \text{ [mol} \cdot \text{L}^{-1}]$ ,  $\epsilon_{520} = 2.7 \cdot 10^4$ ,  $\epsilon_{361} = 8.7 \cdot 10^4 \text{ L} \cdot \text{mol}^{-1} \cdot \text{cm}^{-1}$ ).

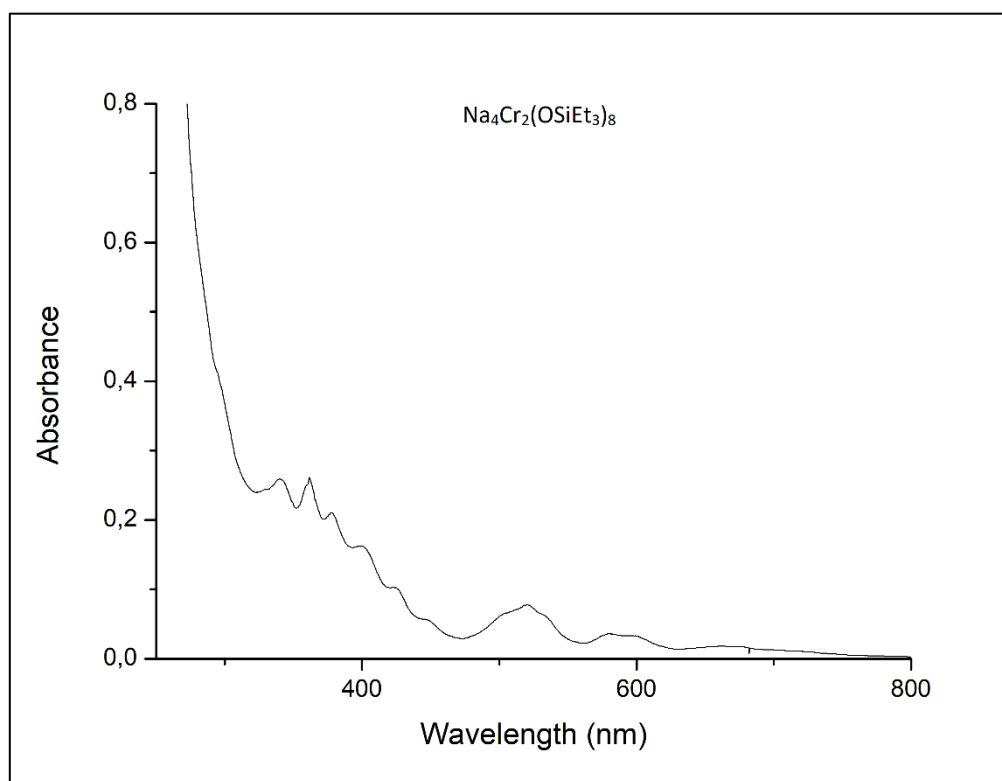

**Figure S21.** UV-vis spectrum of compound **8** in dilute *n*-hexane solution.

## Crystallographic Information

**Table S1.** Crystallographic data for compound **1**, **2**, **3**, **4** and, **5**

|                                                               | [Cr(OSiPr <sub>3</sub> )(μ-OSiPr <sub>3</sub> )(thf) <sub>2</sub> ] (1)         | [Cr <sub>3</sub> (OSiPr <sub>3</sub> ) <sub>2</sub> (μ-OSiPr <sub>3</sub> ) <sub>4</sub> ] (2) | [Cr(OSiPr <sub>3</sub> ) <sub>2</sub> (tmeda)] (3)                              | [Cr(OSiPr <sub>3</sub> ) <sub>3</sub> (thf) <sub>2</sub> ] (4)   | [Cr <sub>2</sub> Cl <sub>3</sub> (OSiPr <sub>3</sub> ) <sub>3</sub> (thf) <sub>3</sub> ] (5)   |
|---------------------------------------------------------------|---------------------------------------------------------------------------------|------------------------------------------------------------------------------------------------|---------------------------------------------------------------------------------|------------------------------------------------------------------|------------------------------------------------------------------------------------------------|
| <b>Formula</b>                                                | C <sub>44</sub> H <sub>100</sub> Cr <sub>2</sub> O <sub>6</sub> Si <sub>4</sub> | C <sub>54</sub> H <sub>126</sub> Cr <sub>3</sub> O <sub>6</sub> Si <sub>6</sub>                | C <sub>24</sub> H <sub>58</sub> CrN <sub>2</sub> O <sub>2</sub> Si <sub>2</sub> | C <sub>35</sub> H <sub>79</sub> CrO <sub>5</sub> Si <sub>3</sub> | C <sub>39</sub> H <sub>87</sub> Cl <sub>3</sub> Cr <sub>2</sub> O <sub>6</sub> Si <sub>3</sub> |
| <b>CCDC</b>                                                   | 2149139                                                                         | 2149143                                                                                        | 2149140                                                                         | 2149142                                                          | 2149145                                                                                        |
| <b>M<sub>r</sub> [g mol<sup>-1</sup>]</b>                     | 941.59                                                                          | 1196.08                                                                                        | 514.90                                                                          | 716.25                                                           | 946.70                                                                                         |
| <b>color</b>                                                  | violet/blocks                                                                   |                                                                                                |                                                                                 | violet/block                                                     | violet plates                                                                                  |
| <b>crystal system</b>                                         | Monoclinic                                                                      | Triclinic                                                                                      | Monoclinic                                                                      | Orthorhombic                                                     | Monoclinic                                                                                     |
| <b>space group</b>                                            | C 2/c                                                                           | <i>P</i> $\bar{1}$                                                                             | <i>P</i> 2 <sub>1</sub> /c                                                      | <i>P</i> n a 21                                                  | <i>P</i> 2 <sub>1</sub> /c                                                                     |
| <b>a [Å]</b>                                                  | 26.0872(13)                                                                     | 13.8340(8)                                                                                     | 20.997(4)                                                                       | 45.286(4)                                                        | 12.7399(15)                                                                                    |
| <b>b [Å]</b>                                                  | 11.7092(6)                                                                      | 14.4338(9)                                                                                     | 29.553(5)                                                                       | 13.8630(12)                                                      | 20.409(2)                                                                                      |
| <b>c [Å]</b>                                                  | 21.6971(11)                                                                     | 18.5308(11)                                                                                    | 15.170(3)                                                                       | 13.4511(11)                                                      | 20.149(2)                                                                                      |
| <b>α [°]</b>                                                  | 90                                                                              | 104.537(2)                                                                                     | 90                                                                              | 90                                                               | 90                                                                                             |
| <b>β [°]</b>                                                  | 123.1860(10)                                                                    | 100.026(2)                                                                                     | 102.489(2)                                                                      | 90                                                               | 104.579(2)                                                                                     |
| <b>γ [°]</b>                                                  | 90                                                                              | 95.480(2)                                                                                      | 90                                                                              | 90                                                               | 90                                                                                             |
| <b>V [Å<sup>3</sup>]</b>                                      | 5546.6(5)                                                                       | 3489.2(4)                                                                                      | 9191(3)                                                                         | 8444.6(12)                                                       | 5070.1(10)                                                                                     |
| <b>Z</b>                                                      | 4                                                                               | 2                                                                                              | 12                                                                              | 8                                                                | 4                                                                                              |
| <b>T [K]</b>                                                  | 100(2)                                                                          | 173(2)                                                                                         | 173(2)                                                                          | 100(2)                                                           | 100(2)                                                                                         |
| <b>ρ<sub>calcd</sub> [g cm<sup>-3</sup>]</b>                  | 1.128                                                                           | 1.138                                                                                          | 1.116                                                                           | 1.127                                                            | 1.240                                                                                          |
| <b>μ [mm<sup>-1</sup>]</b>                                    | 0.517                                                                           | 0.602                                                                                          | 0.472                                                                           | 0.391                                                            | 0.696                                                                                          |
| <b>F (000)</b>                                                | 2064                                                                            | 1308                                                                                           | 3408                                                                            | 3160                                                             | 2040                                                                                           |
| <b>total reflns</b>                                           | 40844                                                                           | 113301                                                                                         | 167843                                                                          | 61112                                                            | 101344                                                                                         |
| <b>observed reflns (I &gt; 2σ)</b>                            | 5008                                                                            | 10791                                                                                          | 16855                                                                           | 17260                                                            | 11698                                                                                          |
| <b>R<sub>1</sub>/wR<sub>2</sub> (I &gt; 2σ)<sup>[a]</sup></b> | 0.0377/ 0.0882                                                                  | 0.0453/ 0.1093                                                                                 | 0.0463/ 0.1224                                                                  | 0.0421/ 0.0994                                                   | 0.0271/ 0.0690                                                                                 |
| <b>R<sub>1</sub>/wR<sub>2</sub> (all data)<sup>[a]</sup></b>  | 0.0557/ 0.0989                                                                  | 0.0594/ 0.1228                                                                                 | 0.0817/ 0.1479                                                                  | 0.0540/ 0.1064                                                   | 0.0321/ 0.0726                                                                                 |
| <b>GOF</b>                                                    | 1.035                                                                           | 1.035                                                                                          | 1.015                                                                           | 1.030                                                            | 1.026                                                                                          |

<sup>[a]</sup> R1 = Σ(|F<sub>o</sub>|-|F<sub>c</sub>|)/Σ|F<sub>o</sub>|, F<sub>o</sub> > 4s(F<sub>o</sub>). ωR2 = {Σ[ω (F<sub>o</sub><sup>2</sup>-F<sub>c</sub><sup>2</sup>)<sup>2</sup>]/Σ[ω (F<sub>o</sub><sup>2</sup>)<sup>2</sup>]}<sup>1/2</sup>.

**Table S2.** Crystallographic data for compounds **6**, **7** and **8**

|                                                               | [Cr <sub>3</sub> (OSiEt <sub>3</sub> ) <sub>2</sub> (μ-OSiEt <sub>3</sub> ) <sub>4</sub> (thf) <sub>2</sub> ] ( <b>6</b> ) | [Cr(OSiEt <sub>3</sub> ) <sub>2</sub> ] <sub>4</sub> ( <b>7</b> )               | [Na <sub>4</sub> Cr <sub>2</sub> (OSiEt <sub>3</sub> ) <sub>8</sub> ] ( <b>8</b> )                    |
|---------------------------------------------------------------|----------------------------------------------------------------------------------------------------------------------------|---------------------------------------------------------------------------------|-------------------------------------------------------------------------------------------------------|
| <b>Formula</b>                                                | C <sub>44</sub> H <sub>106</sub> Cr <sub>3</sub> O <sub>8</sub> Si <sub>6</sub>                                            | C <sub>48</sub> H <sub>120</sub> Cr <sub>4</sub> O <sub>8</sub> Si <sub>8</sub> | C <sub>48</sub> H <sub>120</sub> Cr <sub>2.20</sub> Na <sub>3.80</sub> O <sub>8</sub> Si <sub>8</sub> |
| <b>CCDC</b>                                                   | 2149144                                                                                                                    | 2149141                                                                         | 2149146                                                                                               |
| <b>Mr [g mol<sup>-1</sup>]</b>                                | 1087.82                                                                                                                    | 1258.15                                                                         | 1252.01                                                                                               |
| <b>color</b>                                                  | red/blocks                                                                                                                 | brown/ blocks                                                                   | brown/ blocks                                                                                         |
| <b>crystal system</b>                                         | Triclinic                                                                                                                  | Monoclinic                                                                      | Trigonal                                                                                              |
| <b>space group</b>                                            | <i>P</i> $\bar{1}$                                                                                                         | C2/c                                                                            | R3c                                                                                                   |
| <b>a [Å]</b>                                                  | 11.4293(5)                                                                                                                 | 25.353(3)                                                                       | 14.251(3)                                                                                             |
| <b>b [Å]</b>                                                  | 12.4998(6)                                                                                                                 | 12.0914(15)                                                                     | 14.251(3)                                                                                             |
| <b>c [Å]</b>                                                  | 12.9835(6)                                                                                                                 | 24.967(3)                                                                       | 59.481(12)                                                                                            |
| <b>α [°]</b>                                                  | 62.2170(10)                                                                                                                | 90                                                                              | 90.00(3)                                                                                              |
| <b>β [°]</b>                                                  | 67.7320(10)                                                                                                                | 116.114(2)                                                                      | 90.00(3)                                                                                              |
| <b>γ [°]</b>                                                  | 89.9490(10)                                                                                                                | 90                                                                              | 120.00(3)                                                                                             |
| <b>V [Å<sup>3</sup>]</b>                                      | 1483.26(12)                                                                                                                | 6872.5(15)                                                                      | 10462(5)                                                                                              |
| <b>Z</b>                                                      | 1                                                                                                                          | 4                                                                               | 6                                                                                                     |
| <b>T [K]</b>                                                  | 100(2)                                                                                                                     | 100(2)                                                                          | 99(2)                                                                                                 |
| <b>ρ<sub>calcd</sub> [g cm<sup>-3</sup>]</b>                  | 1.218                                                                                                                      | 1.216                                                                           | 1.192                                                                                                 |
| <b>μ [mm<sup>-1</sup>]</b>                                    | 0.703                                                                                                                      | 0.797                                                                           | 0.544                                                                                                 |
| <b>F (000)</b>                                                | 590                                                                                                                        | 2720                                                                            | 4072                                                                                                  |
| <b>total reflns</b>                                           | 54868                                                                                                                      | 48774                                                                           | 60582                                                                                                 |
| <b>observed reflns (I &gt; 2σ)</b>                            | 6198                                                                                                                       | 5628                                                                            | 6074                                                                                                  |
| <b>R<sub>1</sub>/wR<sub>2</sub> (I &gt; 2σ)<sup>[a]</sup></b> | 0.0297/0.0756                                                                                                              | 0.0432/ 0.0948                                                                  | 0.0382/ 0.0994                                                                                        |
| <b>R<sub>1</sub>/wR<sub>2</sub> (all data)<sup>[a]</sup></b>  | 0.0357/0.0797                                                                                                              | 0.0685/ 0.1076                                                                  | 0.0463/ 0.1085                                                                                        |
| <b>GOF</b>                                                    | 1.084                                                                                                                      | 1.028                                                                           | 1.036                                                                                                 |

<sup>[a]</sup> R<sub>1</sub> = Σ(|F<sub>0</sub> - |F<sub>c</sub>||) / Σ|F<sub>0</sub>|, F<sub>0</sub> > 4s(F<sub>0</sub>). ωR<sub>2</sub> = {Σ[ω (F<sub>0</sub><sup>2</sup> - F<sub>c</sub><sup>2</sup>)<sup>2</sup>] / Σ[ω (F<sub>0</sub><sup>2</sup>)<sup>2</sup>]}<sup>1/2</sup>.

## Molecular Drawings

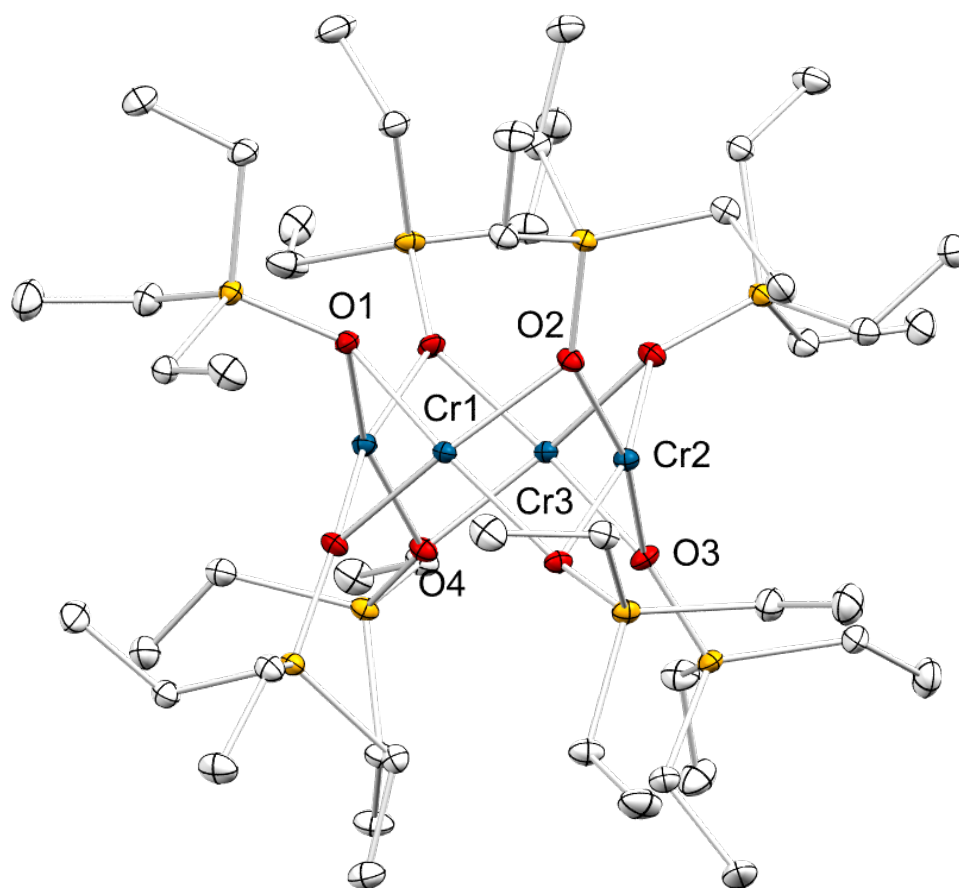

**Figure S22.** MERCURY representation (30% probability ellipsoids) of  $\text{Cr}_4(\text{OSiEt}_3)_8$  (**7**). Hydrogen atoms are omitted for clarity. Selected interatomic distances (Å) and angles (°): Cr1...Cr2 2.5381(6), Cr2...Cr3 2.5325(6), Cr1–O2 2.0046(17), Cr1–O1 2.0199(17), Cr2–O2 1.9907(17), Cr2–O3 1.9940(18), Cr3–O3 1.9939(17), Cr3–O4 2.0077(18), Si1–O1 1.6448(19), Si2–O2 1.6453(18), Si3–O3 1.6425(18), Si4–O4 1.6370(19); O2–Cr1–O1 98.30(7), O2–Cr1–Cr2 50.32(5), O1–Cr1–Cr2 114.93(5), Cr1–Cr2–Cr3 90.83(2), Cr(1)–O(1)–Si(1) 136.95(11), Cr(1)–O(2)–Si(2) 132.78(11), Cr(2)–O(2)–Si(2) 143.38(11), Cr(2)–O(3)–Si(3) 143.57(11), Cr(3)–O(3)–Si(3) 137.32(11), Cr(3)–O(4)–Si(4) 137.91(11).

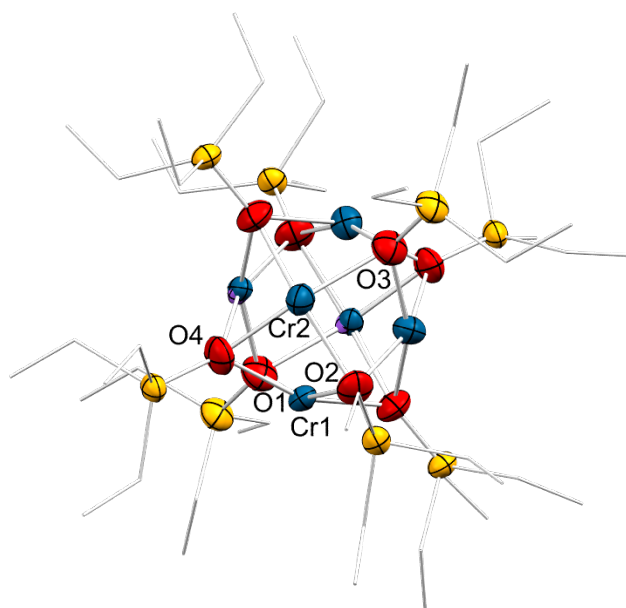

**Figure S23.** MERCURY representation (30% probability ellipsoids) of  $\text{Na}_4\text{Cr}_2(\text{OSiEt}_3)_8$  (**8**). Hydrogen atoms are omitted for clarity. Na1 and Na2 are completely covered by the ellipsoids of Cr1 and Cr2 and therefore not visible.

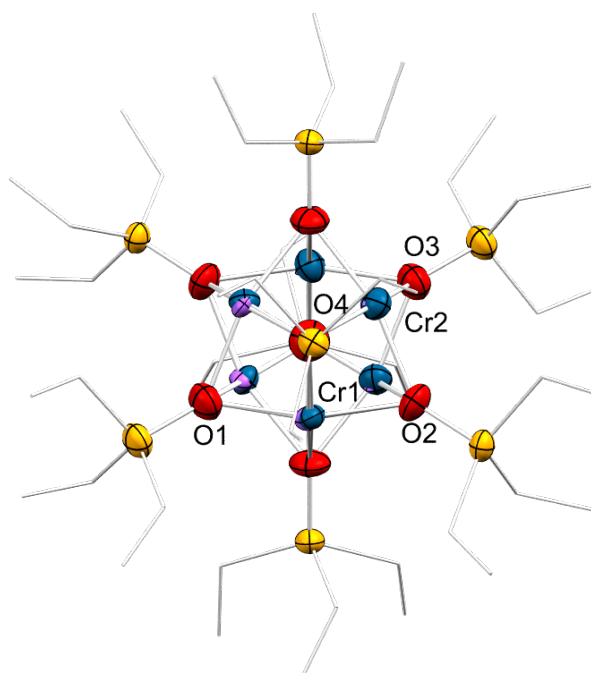

**Figure S24.** MERCURY representation (30% probability ellipsoids) of  $\text{Na}_4\text{Cr}_2(\text{OSiEt}_3)_8$  (**8**). Hydrogen atoms are omitted for clarity.

The octahedron is built by Na and Cr. All six positions are partially occupied by Na and Cr. The disorder model should reveal a Na:Cr ratio of 2:1, to become at least a  $\text{Na}_4\text{Cr}_2$  core. The refinement for the two positions in the asymmetric unit shows exact that ratio for one position, but for the second one we have a divergence (0.588:0.422). This result may be caused by the difficulties in structure solution and the overall disorder in the molecule. In the crystal, the “ball-like” cluster is orientated in distinct directions. Therefore, the averaged contents of the unit cell are obtained by averaging over the space, which leads to substitutional disorder. The divergence for the second position regarding the Na/Cr disorder might be also affect by partial hydrolysis as indicated by a significant OH stretching vibration in the IR spectrum (Figure S15).
